# Supplementary material for: High throughput single cell long-read sequencing analyses of same-cell genotypes and phenotypes in human tumors
Source: PubMed Central journal article supplement (PMC10336110; doi:10.1038/s41467-023-39813-7), 2023-07-11
Supplement: 41467_2023_39813_MOESM2_ESM.pdf [file 41467_2023_39813_MOESM2_ESM.pdf]

## Description of Additional Supplementary Files

**Supplementary Data 1** - Tumor cell specific DCI genes Description: This table includes tumor-cell-specific DCI genes that express different combinations of isoforms in tumor cells comparing to normal cell types in the same tumor.

**Supplementary Data 2** - Endothelial cell specific DCI genes Description: This table includes endothelial-cell-specific DCI genes that express different combinations of isoforms in endothelial cells comparing to other normal cell types in the same tumor.

**Supplementary Data 3** - Myeloid cell specific DCI genes Description: This table includes myeloid-cell-specific DCI genes that express different combinations of isoforms in myeloid cells comparing to other normal cell types in the same tumor.

**Supplementary Data 4** – Follicular B cell specific DCI genes Description: This table includes follicular-cell-specific DCI genes that express different combinations of isoforms in follicular B cells comparing to other normal cell types in the same tumor.

**Supplementary Data 5** – Lymphocyte specific DCI genes Description: This table includes lymphocyte-cell-specific DCI genes that express different combinations of isoforms in T/B cells comparing to other normal cell types in the same tumor.

**Supplementary Data 6** – Plasma cell specific DCI genes Description: This table includes plasma-cell-specific DCI genes that express different combinations of isoforms in plasma cells comparing to other normal cell types in the same tumor.

**Supplementary Data 7** – Fibroblast specific DCI genes Description: This table includes fibroblast-cell-specific DCI genes that express different combinations of isoforms in fibroblasts comparing to other normal cell types in the same tumor.

**Supplementary Data 8** – Tumor cell expanded mutations Description: This table includes point mutations that are significantly expanded in tumor cells comparing to normal cell types in the same tumor.

**Supplementary Data 9** – Myeloid cell expanded mutations Description: This table includes point mutations that are significantly expanded in myeloid cells comparing to other normal cell types in the same tumor.

**Supplementary Data 10** – Plasma cell expanded mutations Description: This table includes point mutations that are significantly expanded in plasma cells comparing to other normal cell types in the same tumor.

**Supplementary Data 11** – Endothelial cell expanded mutations Description: This table includes point mutations that are significantly expanded in endothelial cells comparing to other normal cell types in the same tumor.

**Supplementary Data 12** – Follicular B cell expanded mutations Description: This table includes point mutations that are significantly expanded in follicular B cells comparing to other normal cell types in the same tumor.

**Supplementary Data 13** – Lymphocytes expanded mutations Description: This table includes point mutations that are significantly expanded in T/B cells comparing to other normal cell types in the same tumor.

**Supplementary Data 14** – Fibroblast expanded mutations Description: This table includes point mutations that are significantly expanded in fibroblasts comparing to other normal cell types in the same tumor.
